# Supplementary material
Source: PubMed Central journal article supplement (PMC3400772)
Supplement: mmc2.pdf [file mmc2.pdf]

# Supporting Material: Probing the Elasticity of DNA on Short Length Scales by Modeling Supercoiling under Tension

Robert Schöpflin, Hergen Brutzer, Oliver Müller, Ralf Seidel, Gero Wedemann

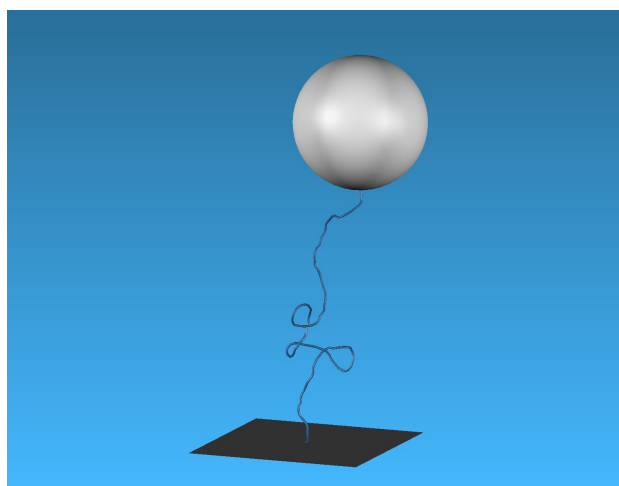

0.5 pN

FIGURE S7: 3D-PDF with snapshots of simulations at low salt conditions (10 mM Na<sup>+</sup>) and different stretching forces.

Please click into an image to activate the 3D mode (Adobe® Reader® 9 or higher is required). Keep the left mouse button pressed and drag the cursor at the same time to rotate the 3D snapshots.

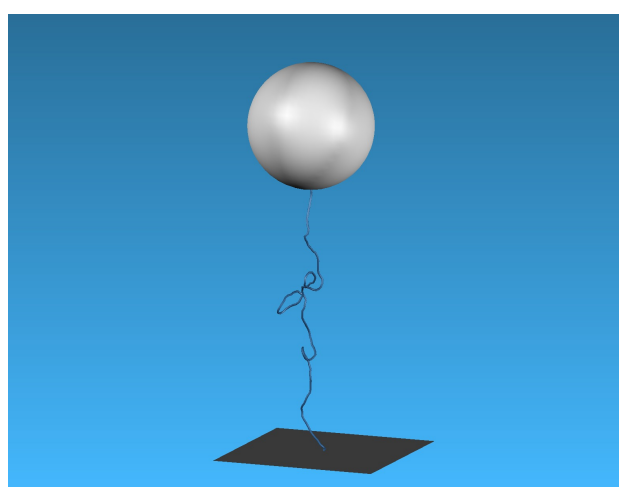

1.0 pN

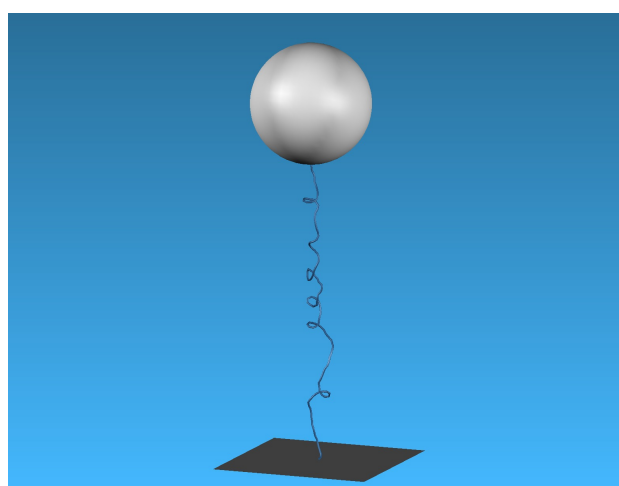

2.0 pN

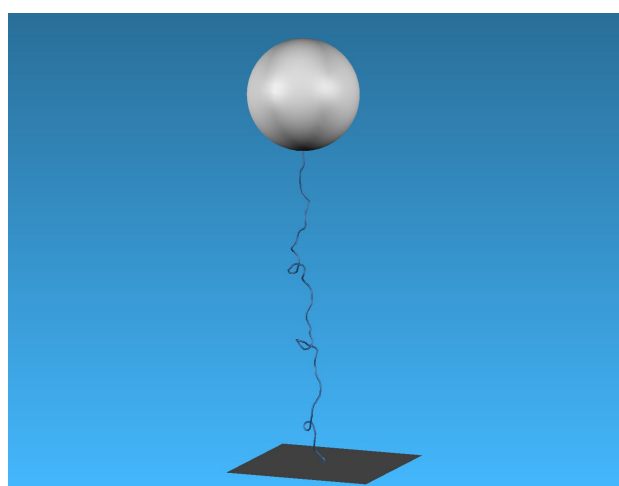

4.0 pN
